# Supplementary material for: Measuring Biogenic Volatile Organic Compounds from Leaves Exposed to Submicron Black Carbon Using Portable Sensor
Source: MDPI journal article supplement (doi:10.3390/pollutants4020012), 2024-04-03
Supplement: s1 [file s1]

# Measuring Biogenic Volatile Organic Compounds from Leaves Exposed to Submicron Black Carbon Using Portable Sensor

Qingyang Liu <sup>1,\*</sup> and Yanju Liu <sup>2</sup>

<sup>1</sup> College of Ecology and Environment, Nanjing Forestry University, Nanjing 210037, China

<sup>2</sup> Institute of Analysis and Testing, Beijing Center for Physical and Chemical Analysis, Beijing Academy of Science and Technology, Beijing 100089, China; liuyanju@bcpca.ac.cn

\* Correspondence: qyliu@njfu.edu.cn

**Table S1.** Isoprene and monoterpenes emission rates ( $\mu\text{g g}^{-1} \text{h}^{-1}$ ) from typical tree species across some areas of China [1].

| Species                        | Isoprene | Monoterpene | Regions     |
|--------------------------------|----------|-------------|-------------|
| <i>Cyclobalanopsis glauca</i>  | 278      | 3.5         | South China |
| <i>Populus tomentosa</i>       | 271      | /           |             |
| <i>Nelumbo nucifera</i>        | 246      | /           |             |
| <i>Quercus glandulifera</i>    | 222      | /           |             |
| <i>Caryotamitis</i>            | 147      | /           |             |
| <i>Salix babylonica</i>        | 132      | /           |             |
| <i>Phyllostachys pubescens</i> | 116      | /           |             |
| <i>Broussonetia papyrifera</i> | 97       | /           |             |
| <i>Pleioblastus amarus</i>     | 86       | /           |             |
| <i>Liquidambar formosana</i>   | 74       | /           |             |
| <i>Albizia Jutibrissin</i>     | 70       | /           |             |
| <i>Trachycarpus fortunei</i>   | 60       | /           |             |
| <i>Salix chaenomeloides</i>    | 58       | /           |             |
| <i>Mahonia fortunei</i>        | 50       | /           |             |
| <i>Pragmites commanis</i>      | 47       | /           |             |
| <i>Quercus fabri</i>           | 43–211   | /           |             |
| <i>Lespedeza bicolor</i>       | 40       | /           |             |
| <i>Dalbergia hupeana</i>       | 34       | /           |             |
| <i>Adenanthera pavonina</i>    | 33       | /           |             |
| <i>Bambusa multiplex</i>       | 20–103   | /           |             |
| <i>Eucalyptus citrodora</i>    | 17       | 3           |             |
| <i>Elaeocarpus apiculatus</i>  | 13       | /           |             |
| <i>Camellia sinensis</i>       | 13       | /           |             |
| <i>Ficus hispida</i>           | 12       | 2           |             |
| <i>Syzygium cumini</i>         | 9        | 13          |             |
| <i>Ficus benjamina</i>         | 9        | /           |             |
| <i>Glochidion puberum</i>      | 9        | /           |             |
| <i>Musa basjoo</i>             | 8        | /           |             |

|                               |     |     |
|-------------------------------|-----|-----|
| <i>Typha orient</i>           | 6   | /   |
| <i>Ficus altissima</i>        | 6   | /   |
| <i>Eucalyptus robusta</i>     | 5   | 0.1 |
| <i>Indocalamus latifolius</i> | 4   | /   |
| <i>Bambusa vulgaris</i>       | 2   | 11  |
| <i>Koelreuteria bipinnata</i> | 2   | 6   |
| <i>Duabanga grandiflora</i>   | 0.8 | 3   |
| <i>Pinus massoniana</i>       | 0.7 | 1   |
| <i>Litchi chinensis</i>       | /   | 15  |
| <i>Avicennia marina</i>       | /   | 12  |
| <i>Carmona microphylla</i>    | /   | 10  |
| <i>Platanus orientalis</i>    | 139 | 0.3 |
| <i>Populus tomentosa</i>      | 105 | 0.2 |
| <i>Salix babylonica</i>       | 70  | 4   |
| <i>Sophora japonica</i>       | 52  | 2   |
| <i>Quercus</i>                | 32  | 8   |
| <i>Robinia pseudoacacia</i>   | 37  | 2   |
| <i>Quercus Mongolica</i>      | 9   | 0.2 |
| <i>Ilex chinensis</i>         | 5   | 7   |
| <i>Pinus tabuliformis</i>     | 0.4 | 19  |
| <i>orientalis</i>             |     |     |
| <i>Malus pumila</i> Mill      | 0.8 | 278 |
| <i>Oryza sativa</i>           | 0.7 | 16  |
| <i>Lespedeza bicolor</i>      | 0.3 | 0.1 |
| <i>Prunus persica</i>         | 0.2 | 6   |
| <i>Ginkgo biloba</i> L        | /   | 0.2 |
| <i>Pyurs spp</i>              | 0.4 | 1   |
| <i>Triticum aestivum</i>      | /   | 2   |
| <i>Zea mays</i>               | /   | 0.4 |

## References

1. Lun, X.; Lin, Y.; Chai, F.; Fan, C.; Li, H.; Liu, J. Reviews of emission of biogenic volatile organic compounds (BVOC) in Asia. *J. Environ. Sci.* **2020**, *95*, 266–277. DOI: [10.1016/j.jes.2020.04.043](https://doi.org/10.1016/j.jes.2020.04.043)
